# Supplementary material for: Indication of Strongly Correlated Electron Transport and Mott Insulator in Disordered Multilayer Ferritin Structures (DMFS)
Source: MDPI journal article supplement (doi:10.3390/ma14164527), 2021-08-12
Supplement: s1 [file s1]

Supplementary Materials

# Indication of Strongly Correlated Electron Transport and Mott Insulator in Disordered Multilayer Ferritin Structures (DMFS)

Christopher Rourk <sup>1,\*</sup>, Yunbo Huang <sup>2,3,†</sup>, Minjing Chen <sup>2</sup> and Cai Shen <sup>2,3,\*</sup>

<sup>1</sup> Independent Researcher, Dallas 75205, TX, USA

<sup>2</sup> Ningbo Institute of Materials Technology & Engineering Chinese Academy of Sciences. 1219 Zhongguan Road, Zhenhai District, Ningbo 315201, China; huangyunbo@nimte.ac.cn (Y.H.); chenminjing@nimte.ac.cn (M.C.)

<sup>3</sup> College of Materials Science and Opto-Electronic Technology, University of Chinese Academy of Sciences, Beijing 100049, China

\* Correspondence: crourk@jw.com (C.R.); shencai@nimte.ac.cn (C.S.)

† equal contribution.

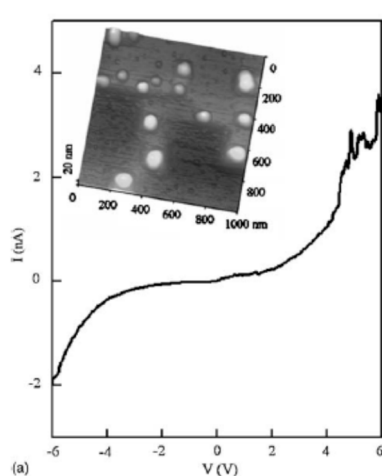

(A)

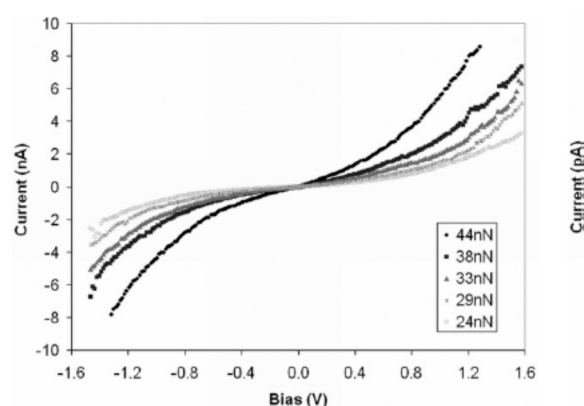

(B)

**Figure S1.** Comparison of semiconductor QD (from [1]) and ferritin I/V curves (from [2]).

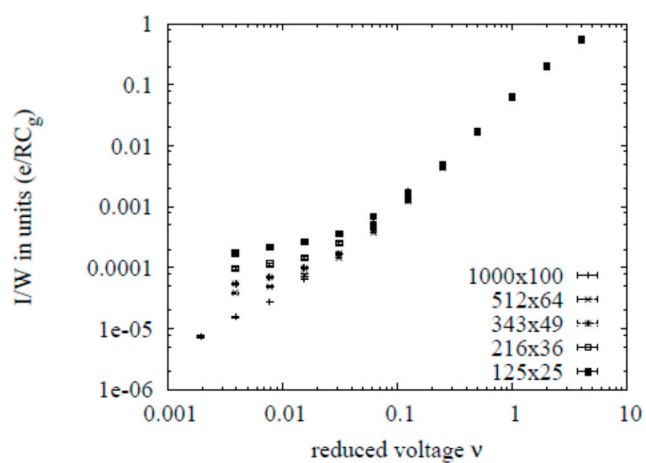

Figure S2. I/V characteristics through 2D arrays of QDs (from [6]).

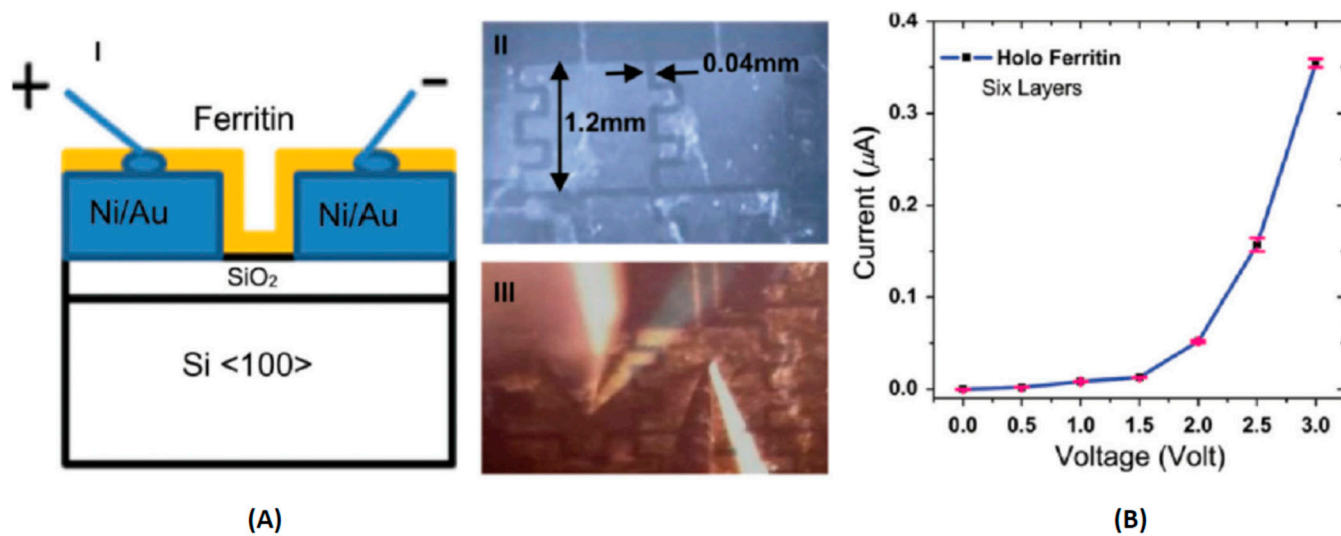

Figure S3. (a) circuit design and (b) current voltage behavior observed in [14].

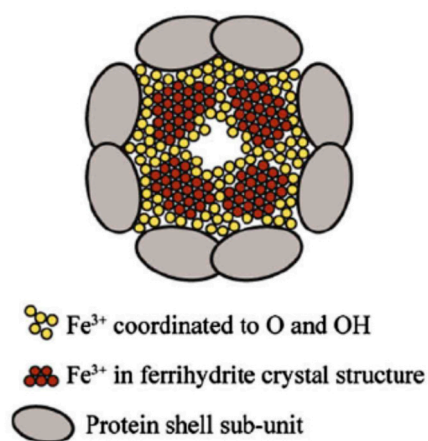

Figure S4. Ferritin structure, from [7].

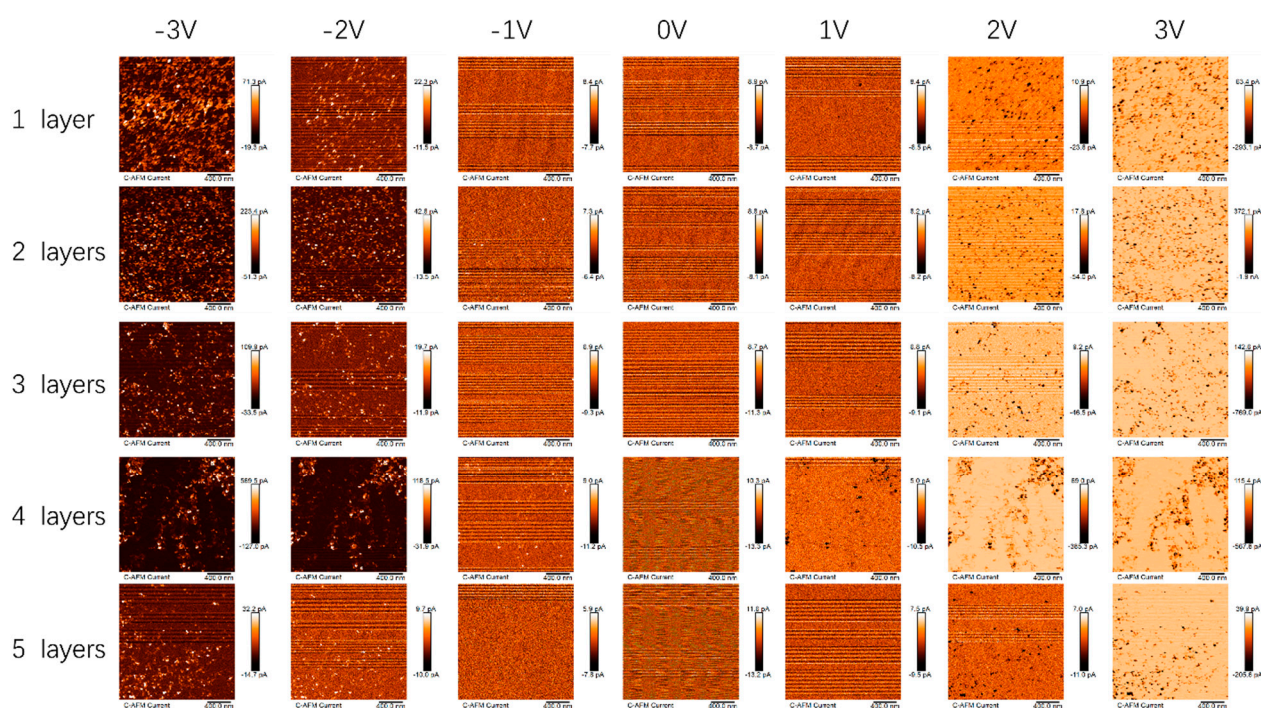

Figure S5. c-AFM image of ferritin on Si substrate.

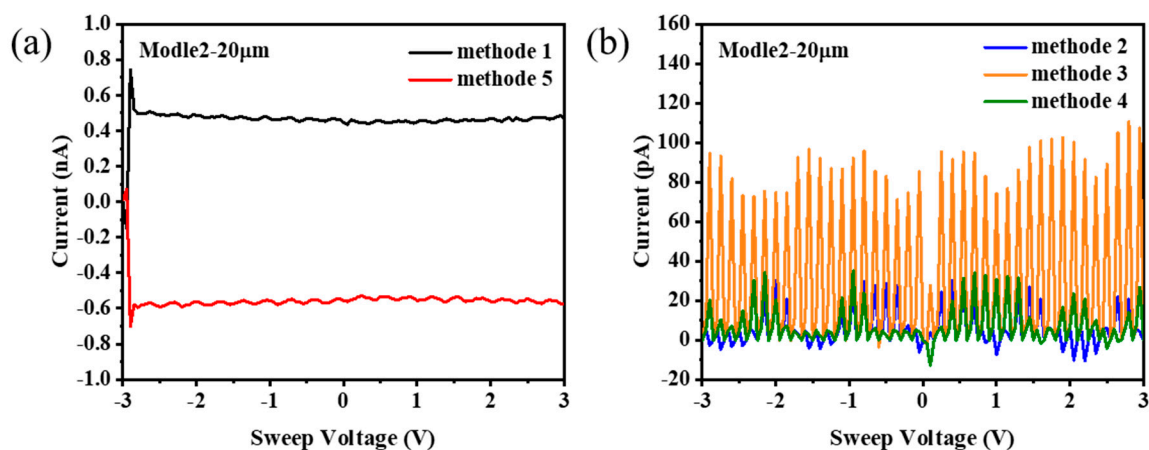

**Figure S6.** (a) I/V response between electrodes A1 and B1-B3 in parallel, no ferritin. (b) Electrodes B2 and B3 were left ungrounded, electrode B1 was grounded, and voltage was applied to electrode A1. .

**Table S1.** Summary of Results.

| Layers of ferri-tin | Die type | Maximum current measured<br>(20, 40 and 80 µm gap, respectively) |
|---------------------|----------|------------------------------------------------------------------|
| 1                   | Model 1  | noise, contaminated, damaged                                     |
| 1                   | Model 2  | noise, noise, noise                                              |
| 2                   | Model 1  | noise, noise, noise                                              |
| 2                   | Model 2  | noise, 1 nA, noise                                               |
| 3                   | Model 1  | --9 nA (retest --140 nA), 5 nA, damaged                          |
| 3                   | Model 2  | damaged, noise, noise                                            |
| 4                   | Model 1  | ---30 nA, --7 nA, damaged                                        |
| 4                   | Model 2  | noise, noise, --3 µA                                             |
| 5                   | Model 1  | noise, --3 µA, noise                                             |
| 5                   | Model 2  | noise, noise, noise                                              |
| 6                   | Model 1  | noise, noise, damaged                                            |
| 6                   | Model 2  | damaged, noise, noise                                            |

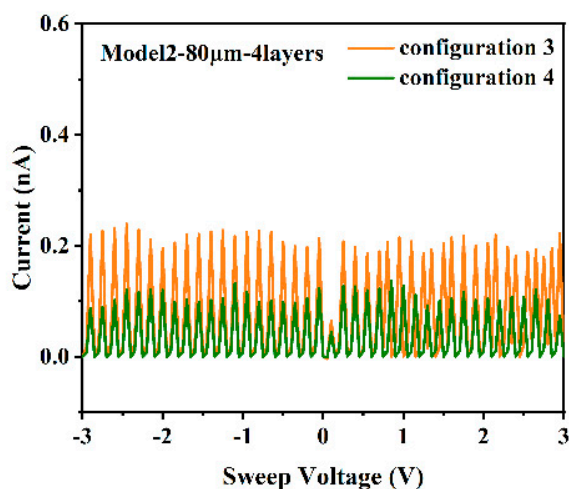

**Figure S7.** I/V curve for voltage applied to A1, B2 (left) and B3 (right) grounded, B1 and B3 float (left) and B1 and B2 float (right), 80  $\mu\text{m}$  gap, 4 layers, model 2.

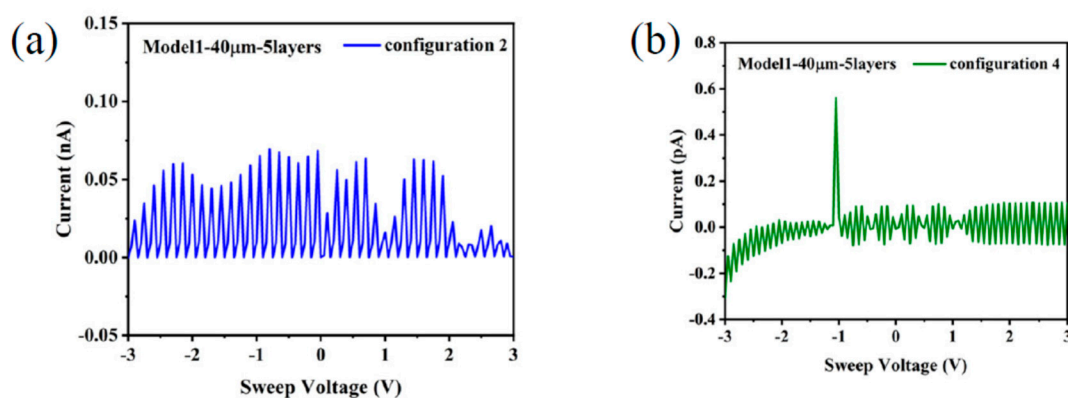

**Figure S8.** I/V curve for voltage applied to: (a) A1, B1 (left) and B3 (right) grounded, B2 and B3 float (configuration 2); and (b) B1 and B2 float (right), 40  $\mu\text{m}$  gap, 5 layers (configuration 4).

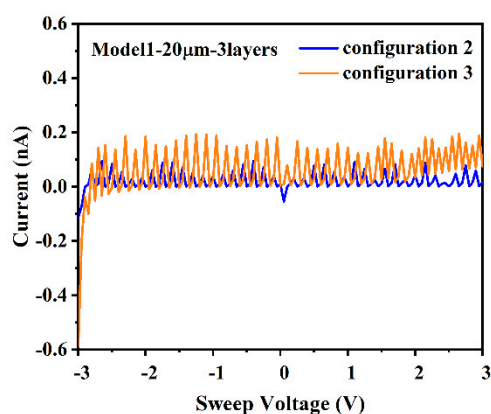

**Figure S9.** I/V curve for voltage applied to: a) A1, B1 (left) and B2 (right) grounded, B2 and B3 float (Configuration 2) and B1 and B3 float (Configuration 3), 20  $\mu\text{m}$  gap, 3 layers.
